# Supplementary material
Source: PubMed Central journal article supplement (PMC6826045)
Supplement: develop-146-179093-s1.pdf [file develop-146-179093-s1.pdf]

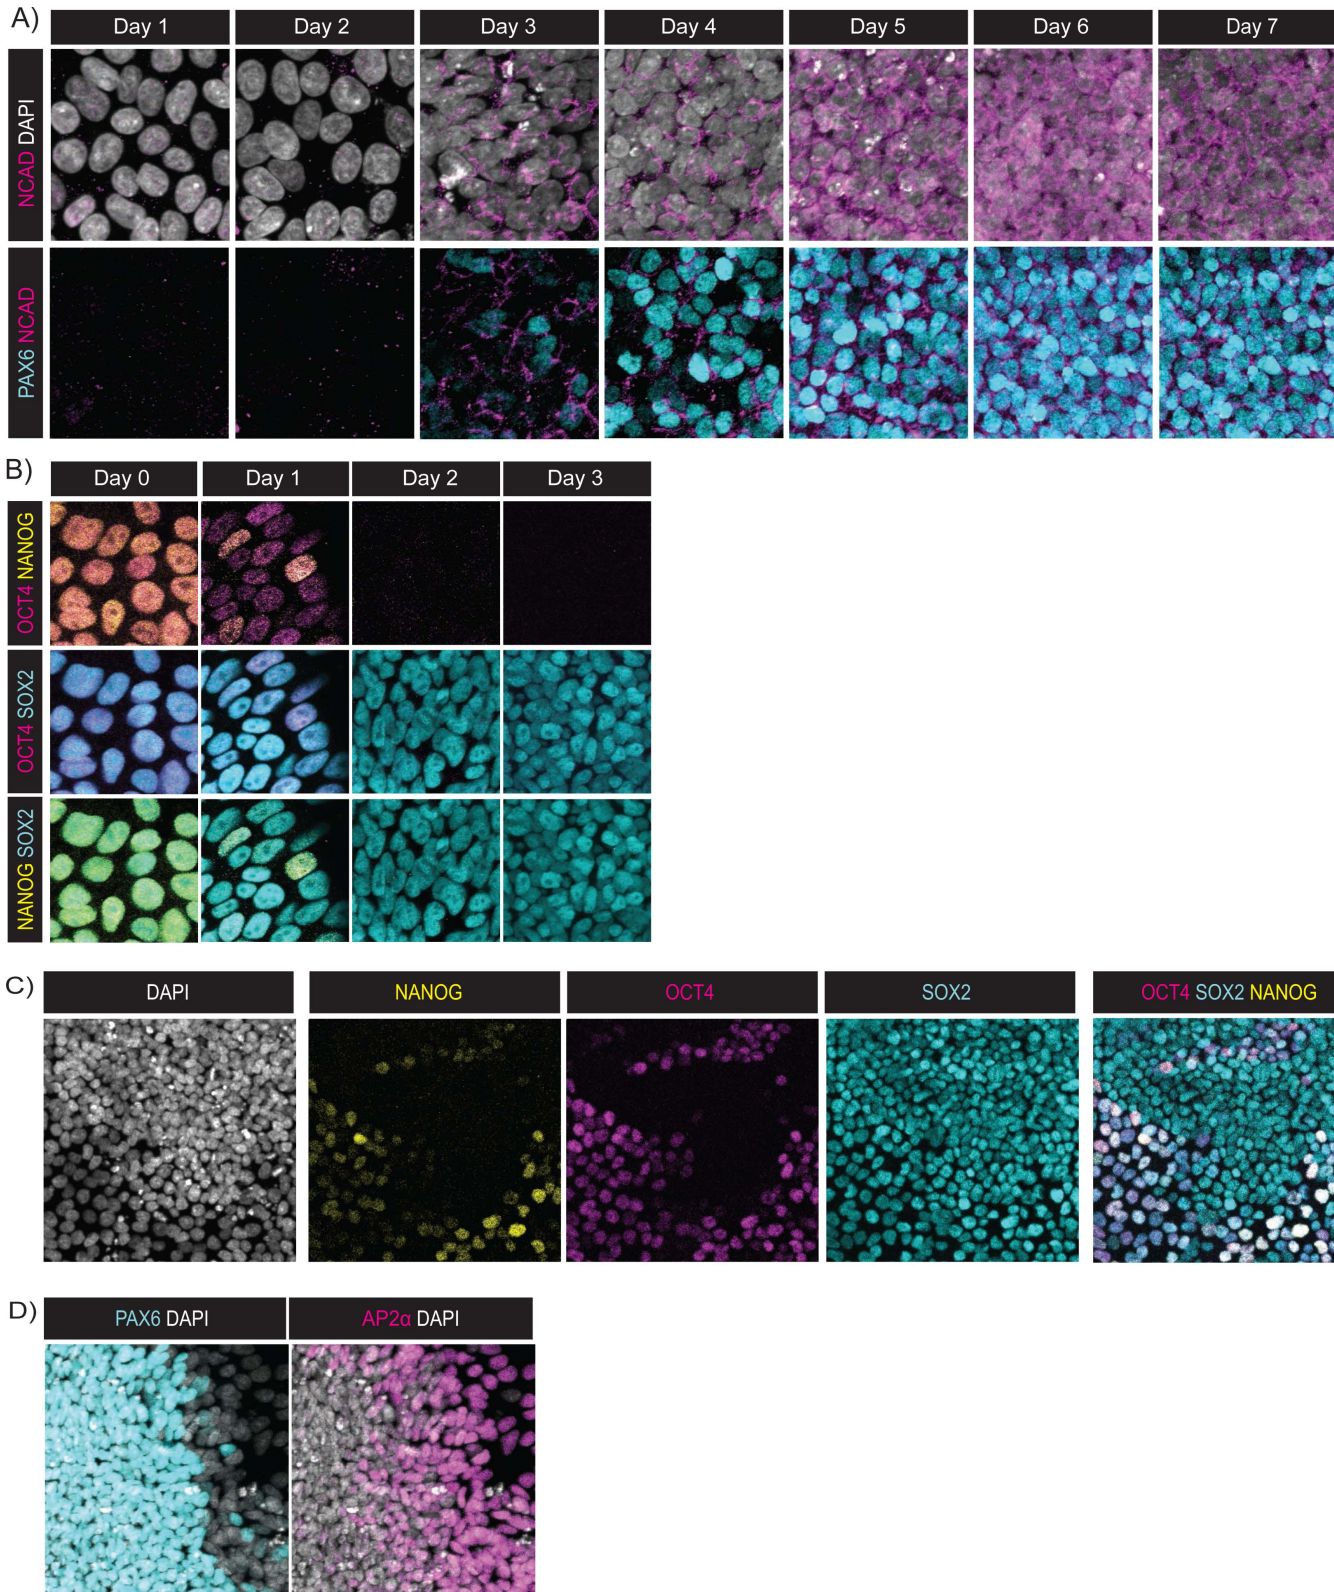

**Figure S1: Nodal inhibition suppresses NANOG and OCT4 and then instructs expression of NCAD and PAX6 (related to Figure 1)**

(A-B) Representative images of cells in standard culture fixed on the indicated days during the course of Nodal inhibition and immunostained for the neural progenitor marker NCAD and PAX6 (A) or SOX2, OCT4 and NANOG (B) at the conclusion of the induction. Experiment replicated 3 times. (C-D) Representative images of cells immunofluorescently co-stained for AP2/PAX6 or SOX2/NANOG/OCT4 at the conclusion of a two-phase induction protocol. Cells were initially differentiated in phase 1 for either 2 (C) or 4 (D) days in Nodal inhibition media and then treated with the indicated culture conditions for the subsequent 6 (C) or 4 (D) days in phase 2. Experiment replicated 3 times. Scalebar in A and B = 25  $\mu$ m; in C and D = 50  $\mu$ m.

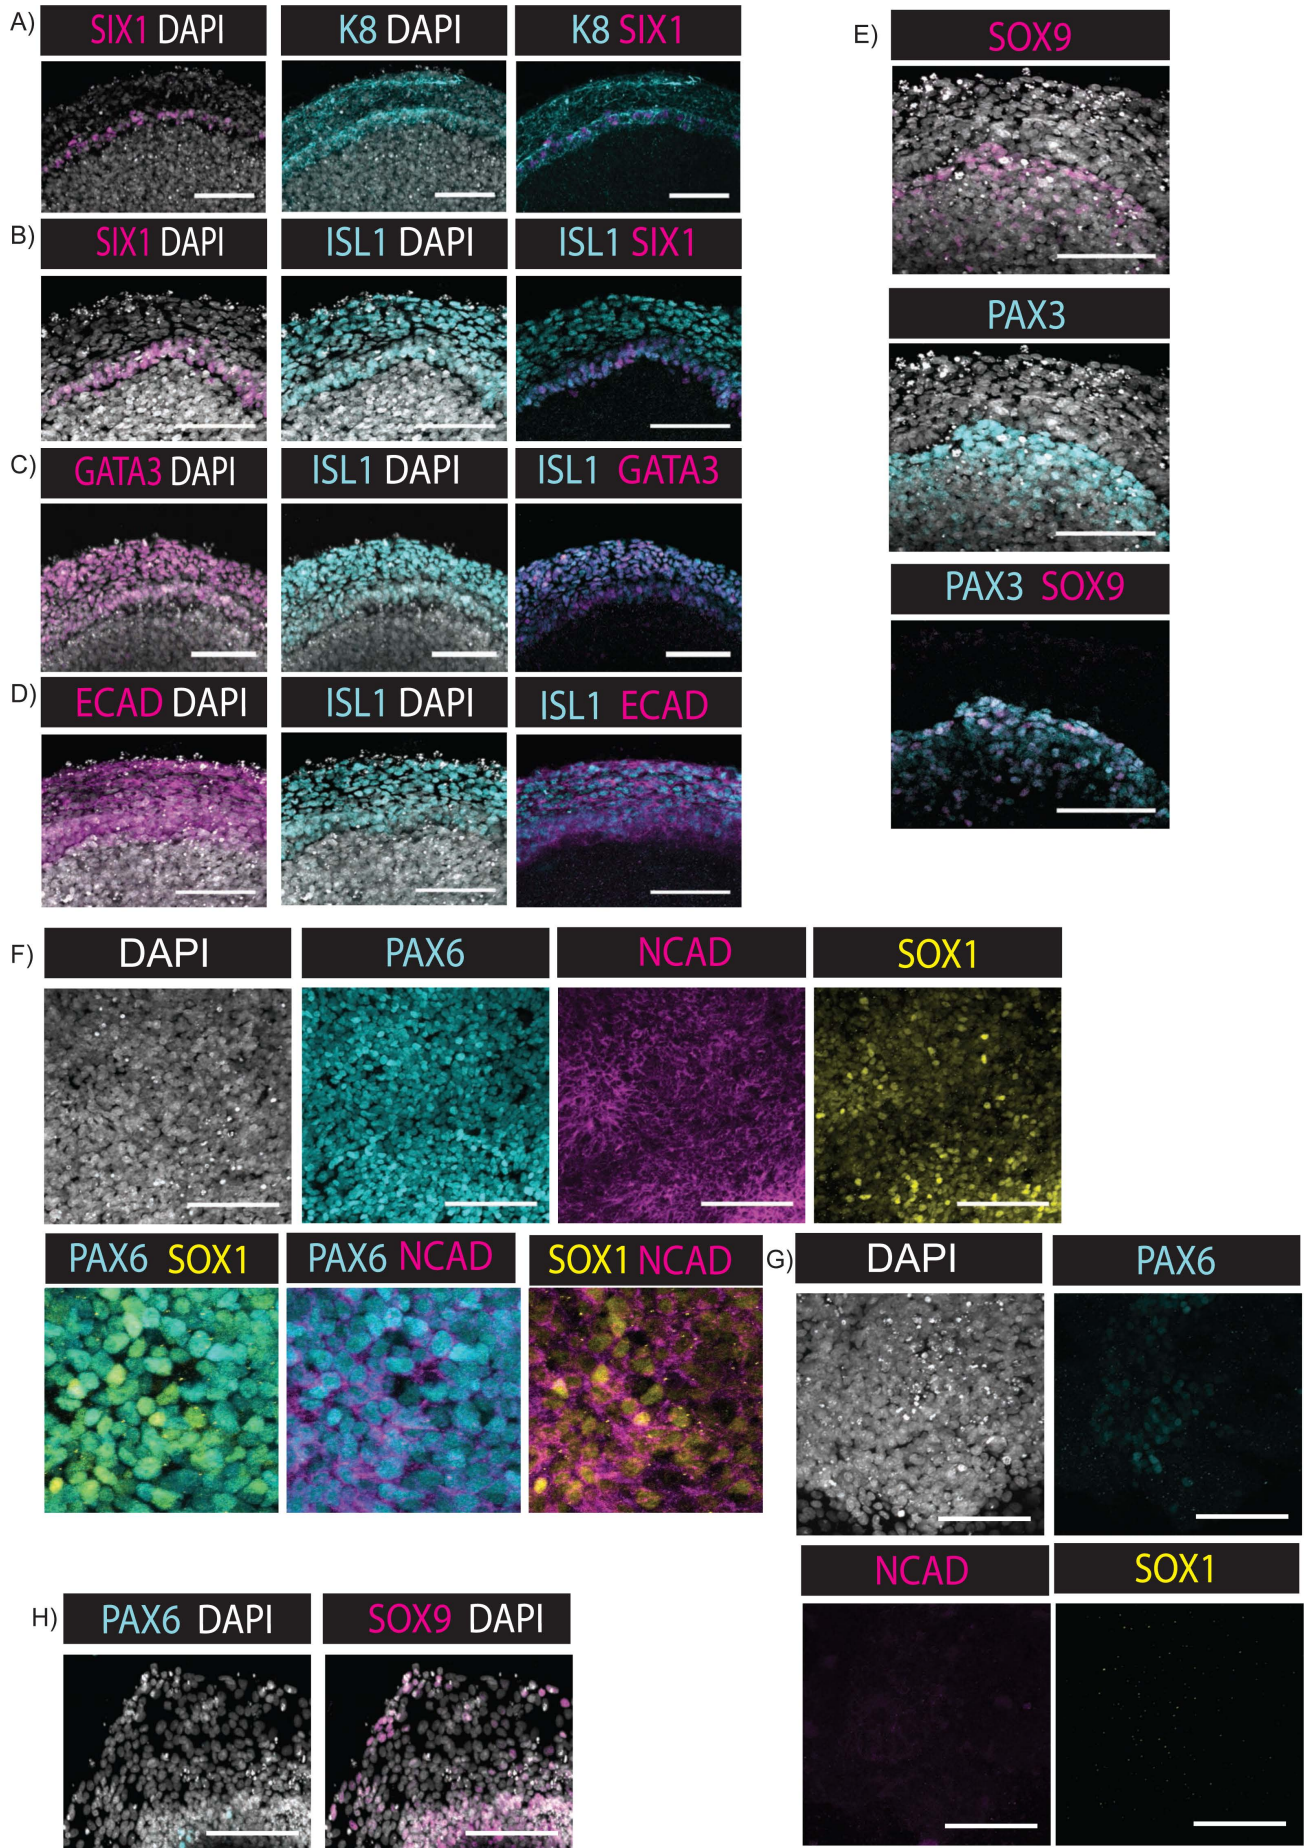

**Figure S2: Two-step ectoderm induction protocol instructs gene expression patterns associated with anterior fates (related to Figure 2)**

(A-E) Representative images of the colony edge following a two-step ectoderm induction protocol and co-stained for SIX1/K8 (A), SIX1/ISL1 (B), GATA3/ISL1 (C), ECAD/ISL1 (D) and SOX9/PAX3 (E). (F) Representative images of the colony center following a two-step ectoderm induction protocol and co-stained for PAX6, NCAD and SOX1. (G-H) Representative images of the colony center (G) and edge (H) with the indicated antibodies following 3 days of induction in N2B27 alone and 3 days in BMP+SB. Experiment replicated at least 3 times. Colony diameter = 700  $\mu\text{m}$ . Scalebar = 100  $\mu\text{m}$ .

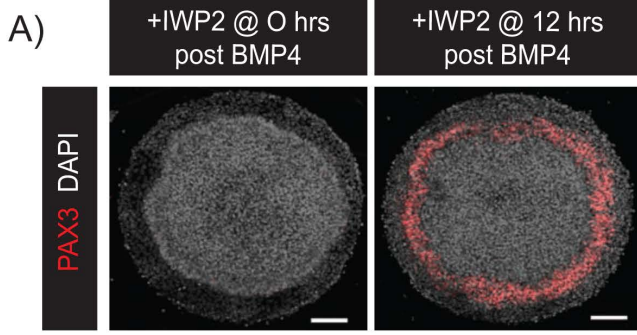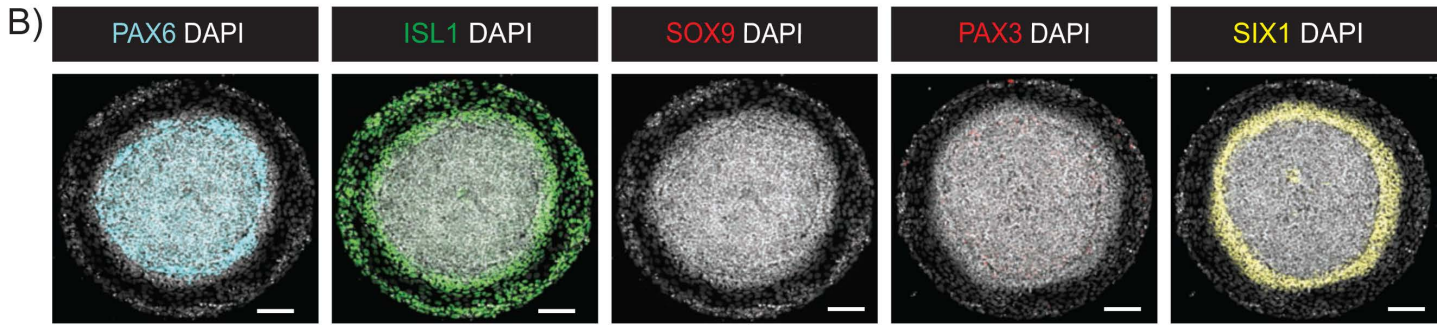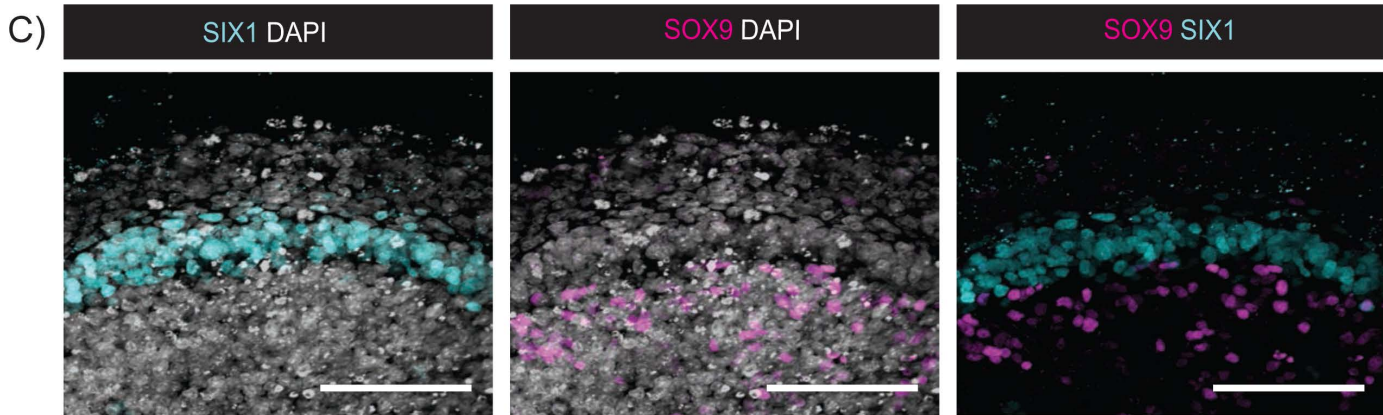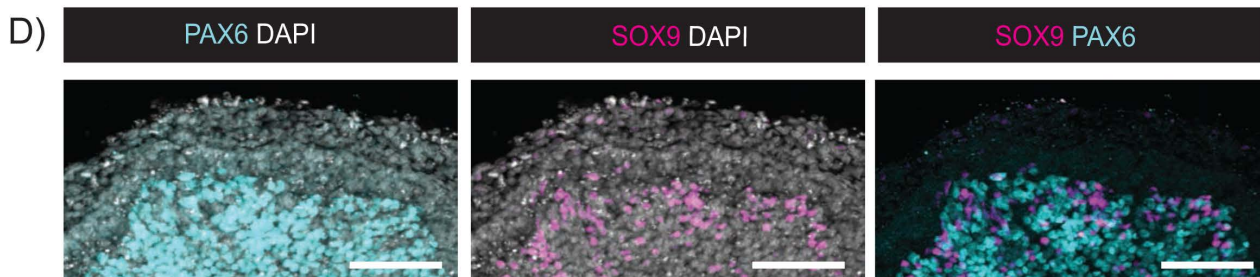

**Figure S3: WNT inhibition before or at the time of BMP4 treatment inhibits neural crest emergence (related to figure 3)**

(A) Representative images of colonies immunostained for PAX3 at the conclusion of the experiment. Colonies were initially induced for 3 days in ectoderm induction media and then subsequently differentiated for 3 days in N2B27 media containing BMP4 and SB. The time between BMP4 and IWP2 addition is indicated in the banner above the corresponding image. Experiment replicated 4 times. Colony diameter = 700  $\mu\text{m}$ . (B) Representative images of colonies immunostained for PAX6, ISL1, SOX9, PAX3 or SIX1 at the conclusion of induction. Colonies were initially induced for 3 days in ectoderm induction media with IWP2 and then subsequently differentiated for 3 days in N2B27 media containing BMP4, SB and IWP2. Experiment replicated 4 times. (C-D) Representative images of the colony edge co-stained for SIX1/SOX9 (C) and PAX6/SOX9 (D). Colonies were initially induced for 3 days in ectoderm induction media and then subsequently differentiated by IWP2 introduced 12 hours post BMP+SB treatment. Experiment replicated 4 times. Colony diameter = 700  $\mu\text{m}$ . Scalebar = 100  $\mu\text{m}$ .

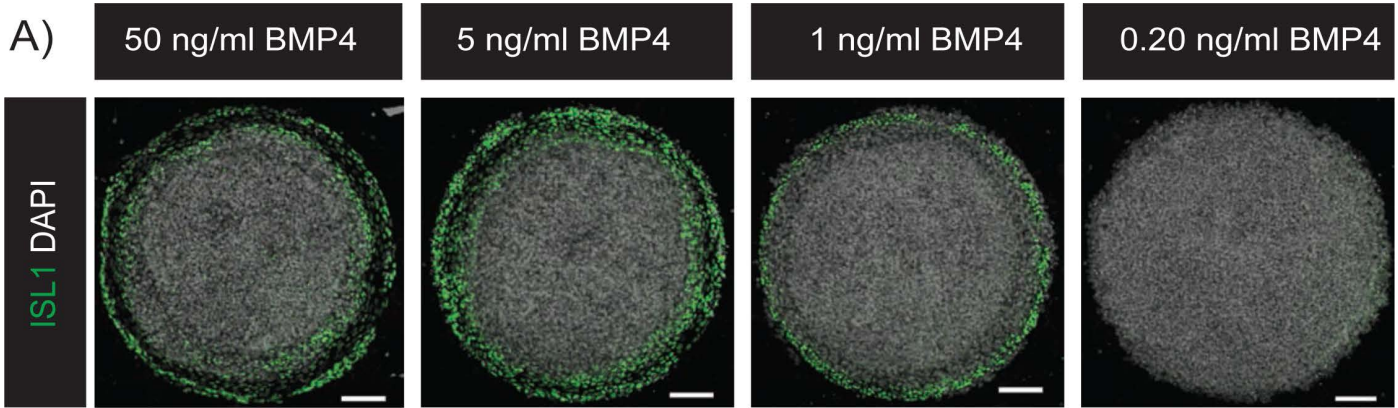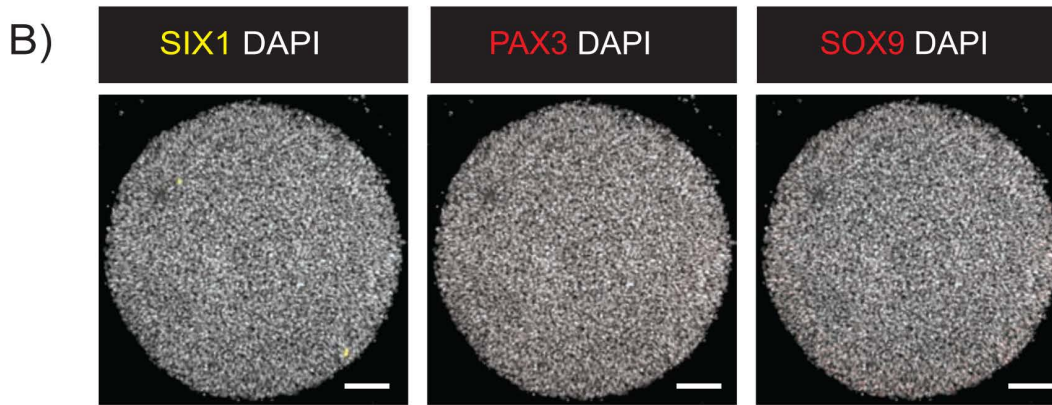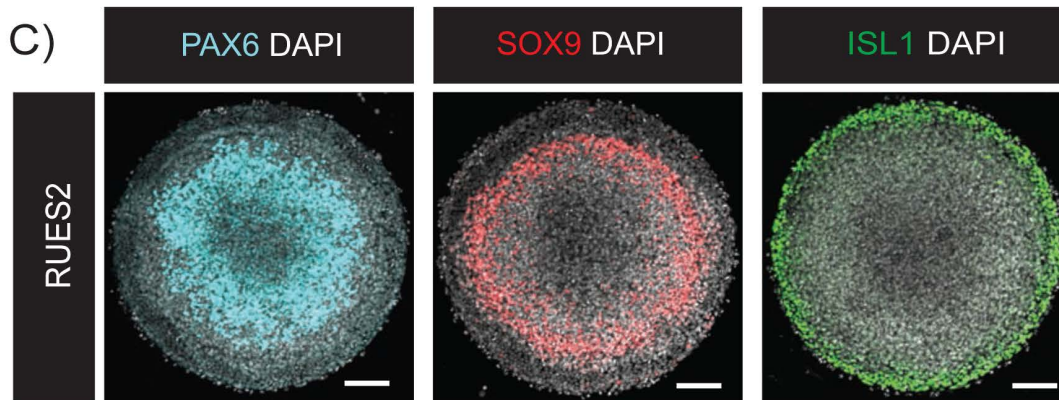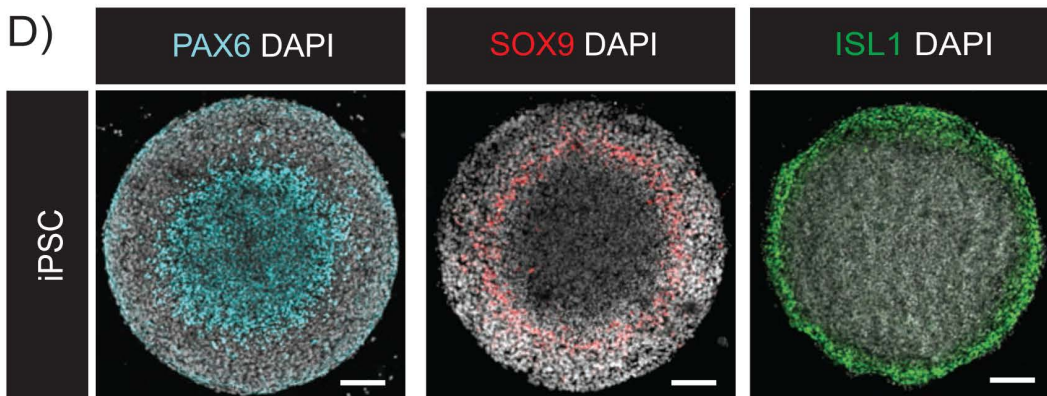

**Figure S4: Surface ectodermal fates require a minimum concentration of BMP4 (related to Figure 4)**

(A) Representative images of colonies immunostained for ISL1 at the conclusion of induction. Colonies were induced with a three-step ectoderm induction protocol and patterned with the indicated concentration of BMP4. Experiment replicated 3 times. Colony diameter = 700  $\mu\text{m}$ . (B) Representative images of colonies immunostained for SIX1, PAX3 or SOX9 at the conclusion of the experiment. Colonies were induced for the first 3 days in ectoderm induction media with IWP2 and then differentiated for the subsequent 3 days in N2B27 media containing 0.20 ng/ml of BMP4, IWP2 and SB. Experiment replicated 2 times (C-D) Representative images of RUES2 (C) and WTC-11 (iPSC) (D) stem cell colonies induced with a three-step ectoderm induction protocol using 2 ng/ml of BMP4 and immunostained for PAX6, SOX9 and ISL1. Experiment replicated 3 times. Colony diameter = 700  $\mu\text{m}$ . Scalebar = 100  $\mu\text{m}$ .

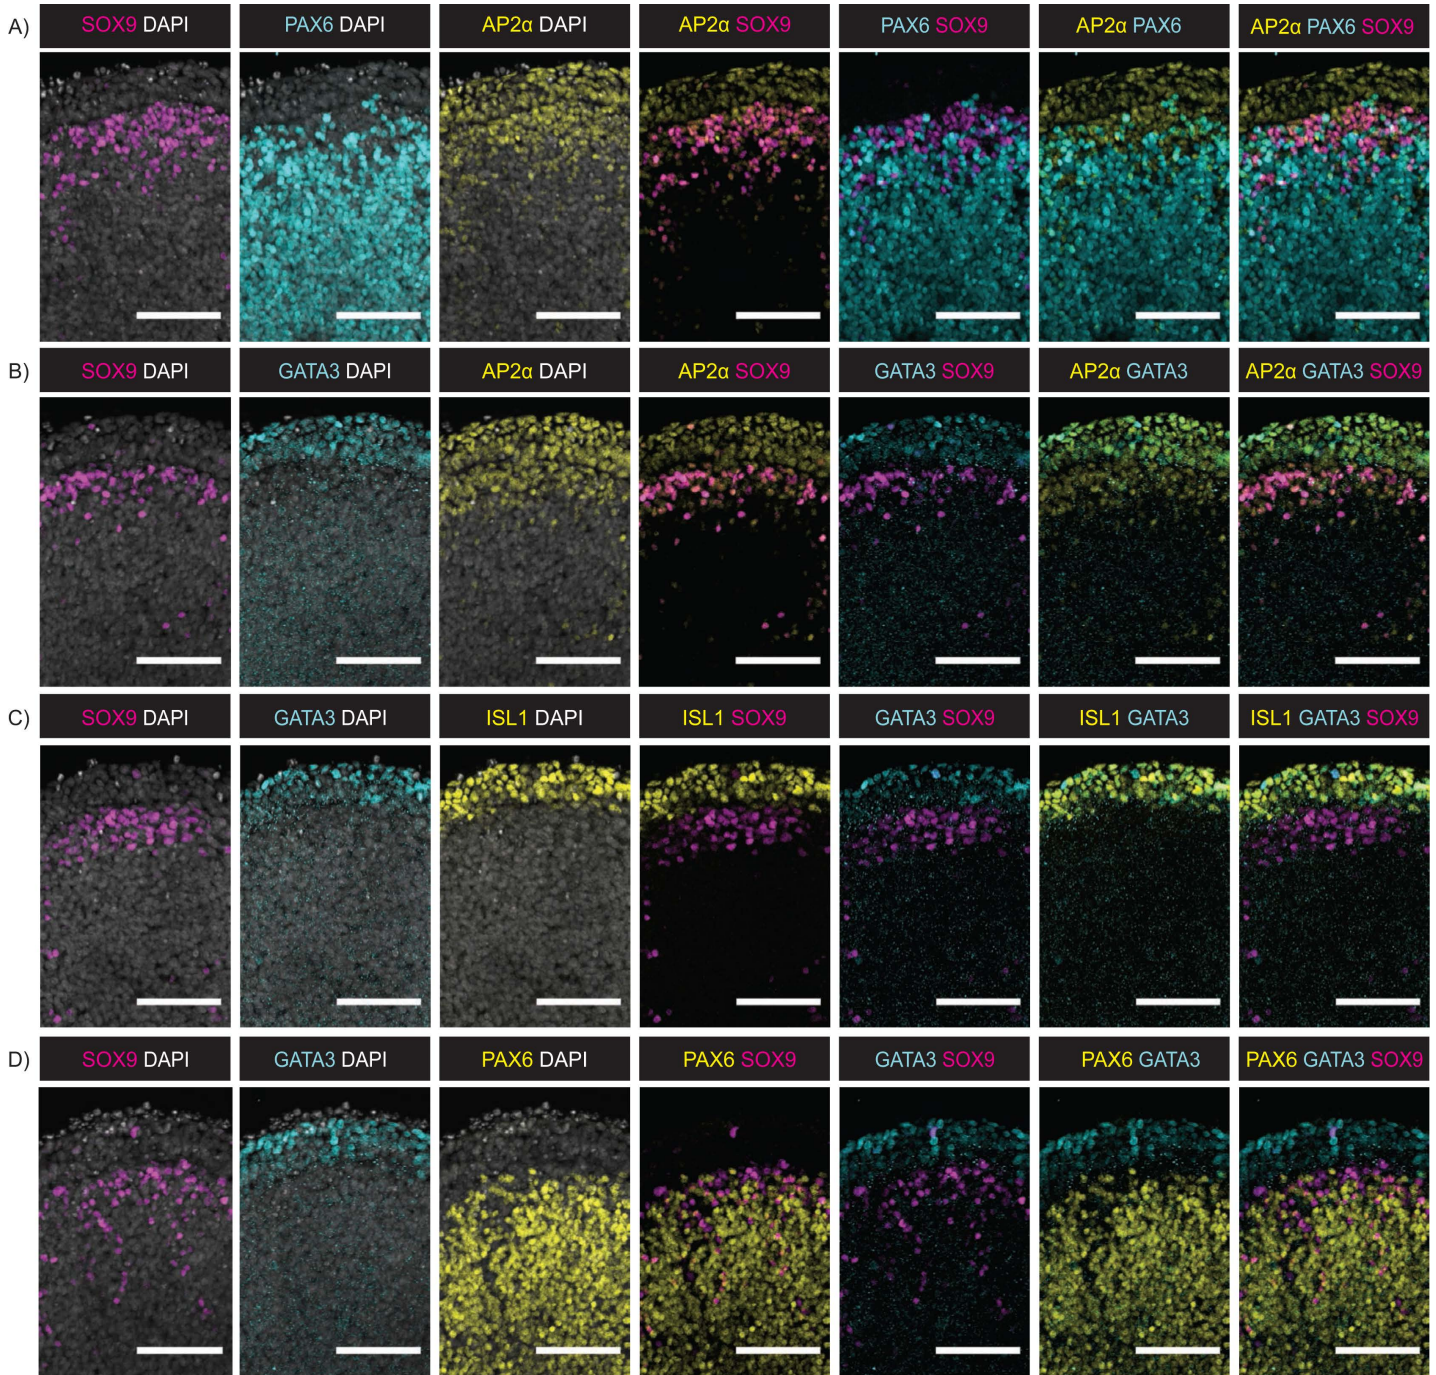

**Figure S5: Separation of human surface and neural ectoderm following a three-step induction protocol using 1 ng/ml of BMP4.**

(A-D) Representative images of day 6 hESC colonies immunostained for the indicated labels. Colonies were induced with a three-step ectoderm induction protocol using 1 ng/ml of BMP4. Experiment replicated 2 times. Colony diameter = 700  $\mu$ m. Scalebar = 100  $\mu$ m.



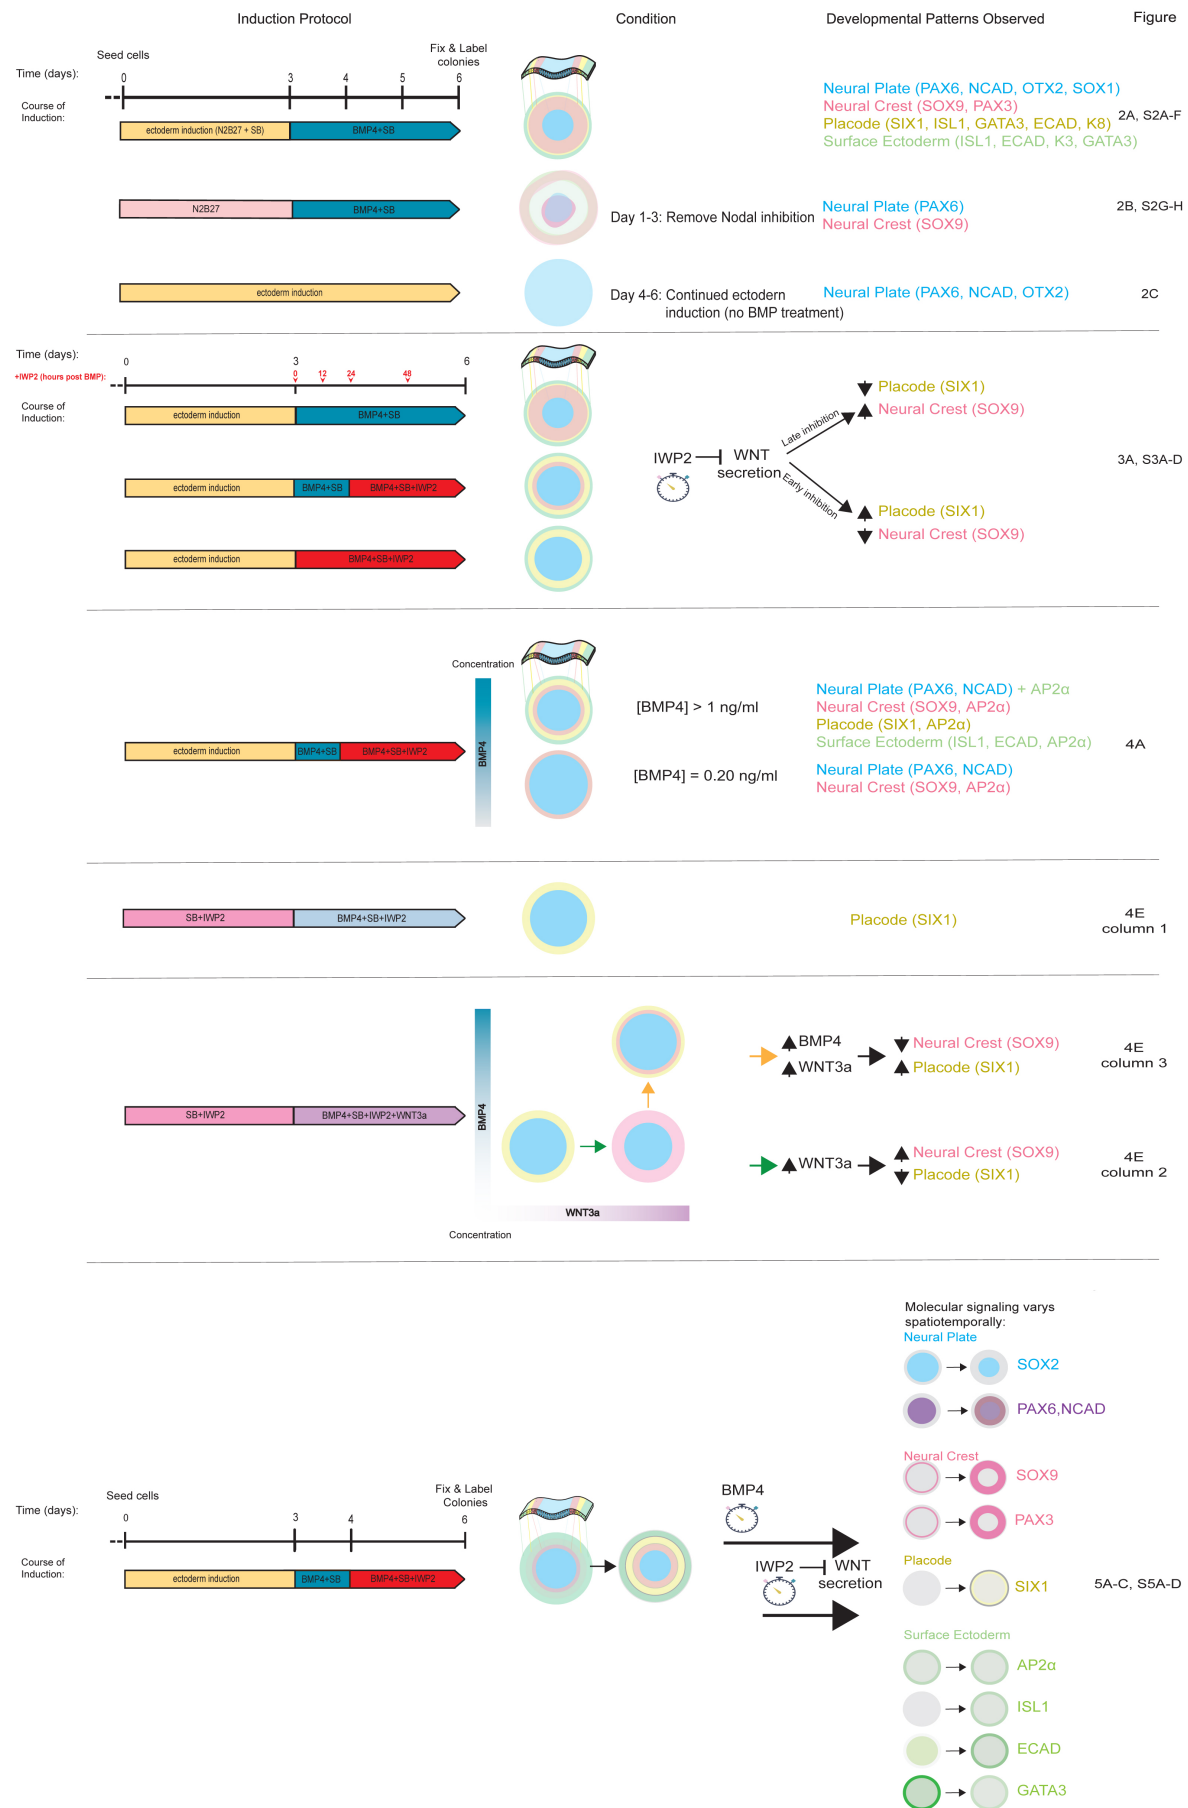

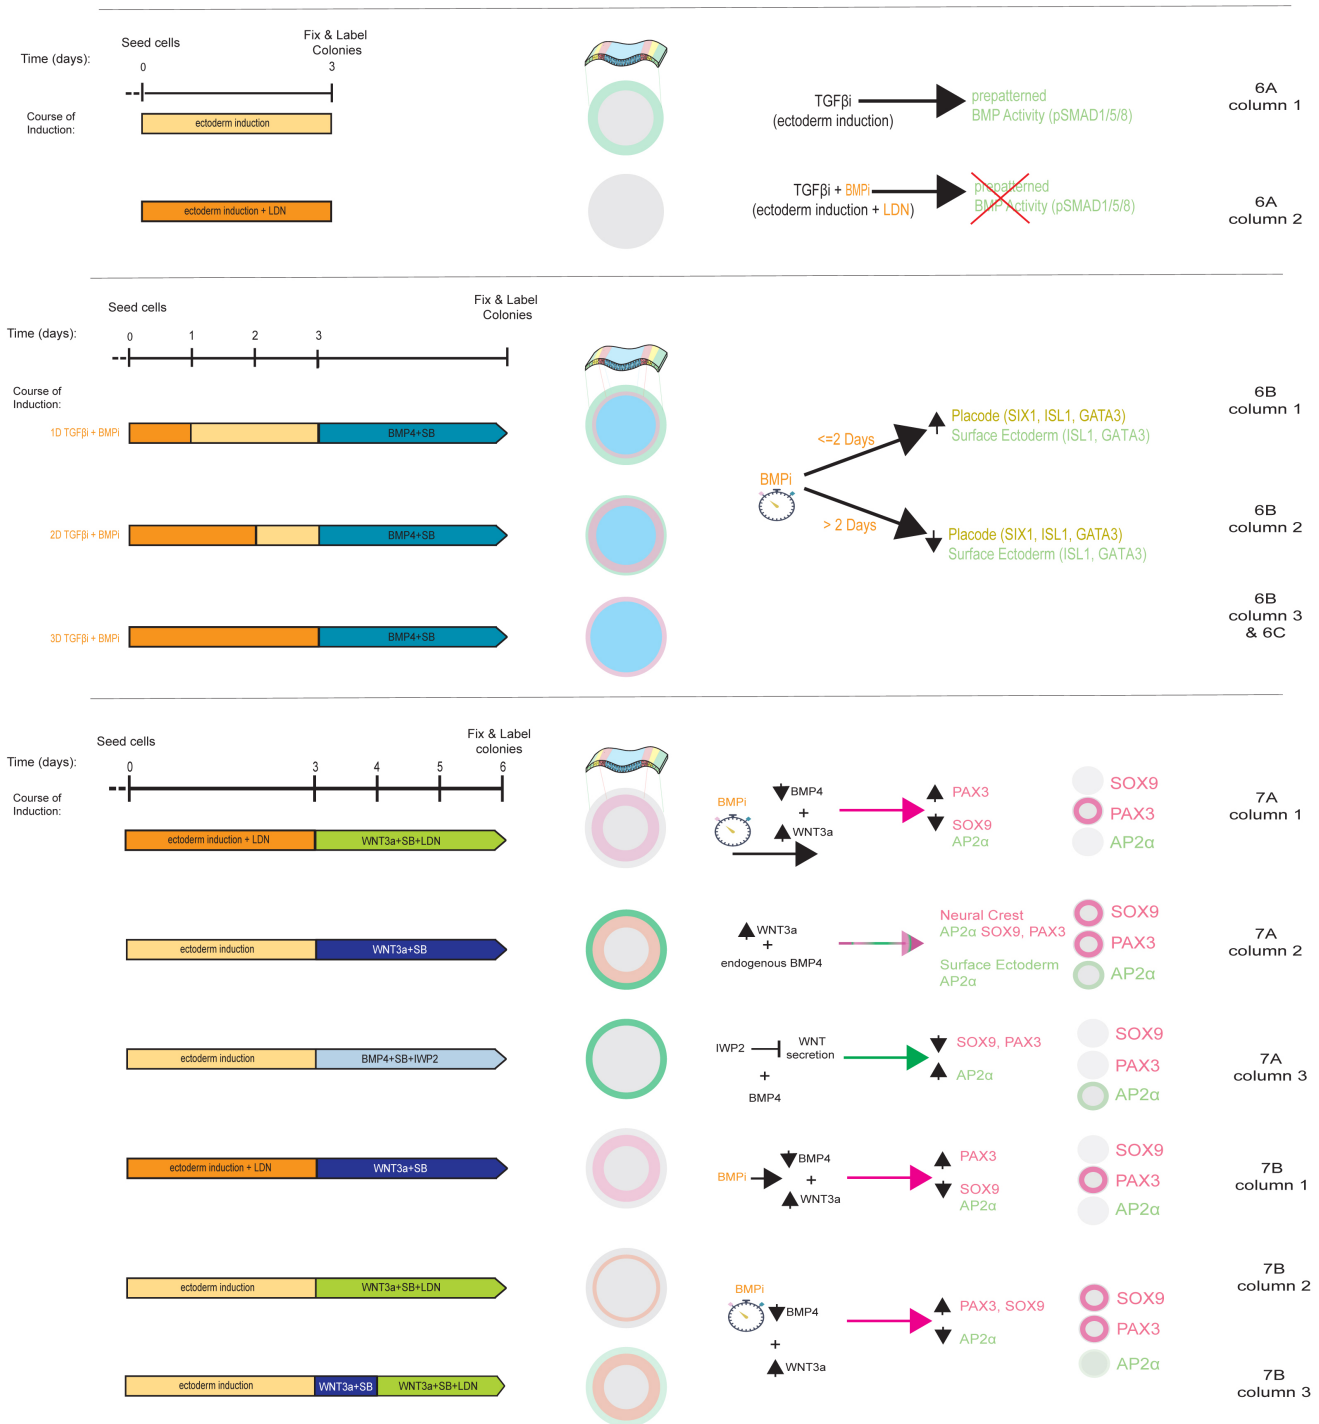

**Table S1: An overview linking spatiotemporal and combinatorial pathway activity to the emergence and position of fates within human ectodermal tissue.**

Overview schematic summarizing the induction protocols and experimental conditions presented in this work and the resulting developmental patterns observed. The self-organizing embryonic stem cell system experimental platform presented here highlights the regulatory role of endogenous WNT signaling (Figures 3, 4, 5 and 7) and defines the signaling logic that guide human ectoderm development (Figures 5 and 7) in a spatiotemporal manner.

| REAGENT or RESOURCE                  | SOURCE                               | IDENTIFIER                      |
|--------------------------------------|--------------------------------------|---------------------------------|
| <i>Antibodies</i>                    |                                      |                                 |
| Goat Anti-SOX9 (1:100)               | R&D Systems                          | Cat# AF3075                     |
| Goat Anti-BRACHYURY (1:300)          | R&D Systems                          | Cat# AF2085                     |
| Mouse Anti-CDX2 (1:50)               | Biogenex                             | Cat# MU392A                     |
| Goat Anti-NANOG (1:100)              | BD Biosciences                       | Cat# 560482                     |
| Mouse Anti-PAX3 (1:30)               | Developmental Studies Hybridoma Bank | Antibody Registry ID# AB528426  |
| Mouse Anti-TFAP2 $\alpha$ (1:100)    | Developmental Studies Hybridoma Bank | Antibody Registry ID# AB2313948 |
| Rabbit Anti-phosphoSMAD1/5/8 (1:200) | Cell Signaling Technologies          | Cat# 13820                      |
| Rabbit Anti-SOX2 (1:200)             | Cell Signaling Technologies          | Cat# 5024S                      |
| Rabbit Anti-SIX1 (1:300)             | Cell Signaling Technologies          | Cat# 12891                      |
| Rabbit Anti-GATA3 (1:200)            | Thermo Fisher Scientific             | Cat# PA1-101                    |
| Rabbit Anti-E-Cadherin (1:300)       | Cell Signaling Technologies          | Cat# 3195S                      |
| Mouse Anti-N-Cadherin (1:200)        | Sigma-Aldrich                        | Cat# C2542                      |
| Mouse Anti-ISL1 (1:75)               | Developmental Studies Hybridoma Bank | Antibody Registry ID# AB2314683 |
| Rabbit Anti-OTX2 (1:300)             | Abcam                                | Cat# 21990                      |
| Mouse Anti-K8 (1:50)                 | Developmental Studies Hybridoma Bank | Antibody Registry ID# AB531826  |
| Mouse Anti-PAX6 (1:50)               | Developmental Studies Hybridoma Bank | Antibody Registry ID# AB528427  |
| Rabbit Anti-PAX6 (1:300)             | Biologend                            | Cat# 901301                     |

| <i>Bacterial Strain</i>                              |                          |                         |
|------------------------------------------------------|--------------------------|-------------------------|
| 5-alpha Competent E.coli                             | New England Biolabs      | Cat# C2987H             |
| <i>Chemicals, Peptides, and Recombinant Proteins</i> |                          |                         |
| Human BMP4 Recombinant Protein                       | Fisher Scientific        | Cat#314BP050            |
| Human Wnt3a Recombinant Protein                      | Amsbio                   | Cat#AMS.rhW3aL-002-stab |
| cOmplete™ Lysis-M                                    | Sigma-Aldrich            | Cat#04719956001         |
| cloneR                                               | STEMCELL Technologies    | Cat#05889               |
| DAPI (4,6-diamidino-2-phenylindole, dihydrochloride) | Fisher Scientific        | Cat#D1306               |
| IWP2                                                 | Stemgent                 | Cat#04-0034             |
| Laemmli Sample Buffer                                | Bio-Rad                  | Cat#1610737             |
| LDN193189                                            | Thermo Fisher Scientific | Cat#04-0074-02          |
| mTeSR1                                               | STEMCELL Technologies    | Cat#85875               |
| Dulbecco's PBS Without calcium and magnesium         | Caisson Labs             | Cat# PBL01-6X500ML      |
| Dulbecco's PBS with calcium and magnesium            | Caisson Labs             | Cat# PBL02-6X500ML      |
| Human recombinant laminin521 protein                 | Biolamina                | Cat# R021599/X0086842   |
| Neurobasal Medium (L-glutamine)                      | Life Technologies        | Cat# 21103-049          |
| Glutamax 100x                                        | Life Technologies        | Cat# 35050061           |
| N-2 Supplement (100x)                                | Life Technologies        | Cat# 17502048           |
| B-27 Supplement (50x), minus vitamin A               | Life Technologies        | Cat# 12587010           |

|                                          |                                                  |                               |
|------------------------------------------|--------------------------------------------------|-------------------------------|
| $\beta$ -Mercaptoethanol                 | Fisher Scientific                                | Cat# 21985023                 |
| DMEM/F12                                 | VWR                                              | Cat# 45000-344                |
| Puromycin                                | Fisher Scientific                                | Cat#A1113803                  |
| ROCK inhibitor Y-27632                   | Fisher Scientific                                | Cat#50-175-998                |
| SB431542                                 | Stemgent                                         | Cat#04-0010-05                |
| 96-well CYTOOplates                      | CYTOO                                            | Cat#20-950-00                 |
| Arena EMB CYTOOchips                     | CYTOO                                            | Cat#10-021-00-18              |
| Ibidi $\mu$ -Plate 24 well black         | Ibidi                                            | Cat#82406                     |
| Ibidi $\mu$ -Slide 8 well                | Ibidi                                            | Cat#80826                     |
| Accutase                                 | Fisher Scientific                                | NC9839010                     |
| <i>Critical Commercial Assays</i>        |                                                  |                               |
| DNeasy Blood and Tissue Kit              | Qiagen                                           | Cat#69504                     |
| HiSpeed Plasmid Midi Kit                 | Qiagen                                           | Cat#12643                     |
| P3 Primary Cell 4D-Nucleofector® X Kit L | Lonza                                            | Cat# V4XP-3024                |
| <i>Experimental Models: Cell Lines</i>   |                                                  |                               |
| ESI-017                                  | ESI BIO                                          | RRID:CVCL_B854                |
| ESI017 GFP- $\beta$ -catenin             | (Massey <i>et al.</i> , 2018)                    |                               |
| RUES2                                    | Gift from Brivanlou lab (Rockefeller University) |                               |
| WTC-11 GFP- $\beta$ -catenin, iPSC       | Paul Allen Institute                             | Cell Line ID: AICS-0058 cl.67 |

| <i>Software and Algorithms</i>                 |            |                                                                                                             |
|------------------------------------------------|------------|-------------------------------------------------------------------------------------------------------------|
| Benchling                                      |            | <a href="https://benchling.com/">https://benchling.com/</a>                                                 |
| MATLAB                                         |            | <a href="https://www.mathworks.com/products/matlab.html">https://www.mathworks.com/products/matlab.html</a> |
| Matlab scripts for quantifying, analyzing data | This paper | <a href="https://github.com/warmflasha/CellTracker">https://github.com/warmflasha/CellTracker</a>           |

**Table S2: Key Resource Table**
